# Supplementary material
Source: Springer Nature journal article supplement (https://www.springermedizin.de/resource/supplementary/13054_2010_8499_MOESM3_ESM.pdf/9732108)

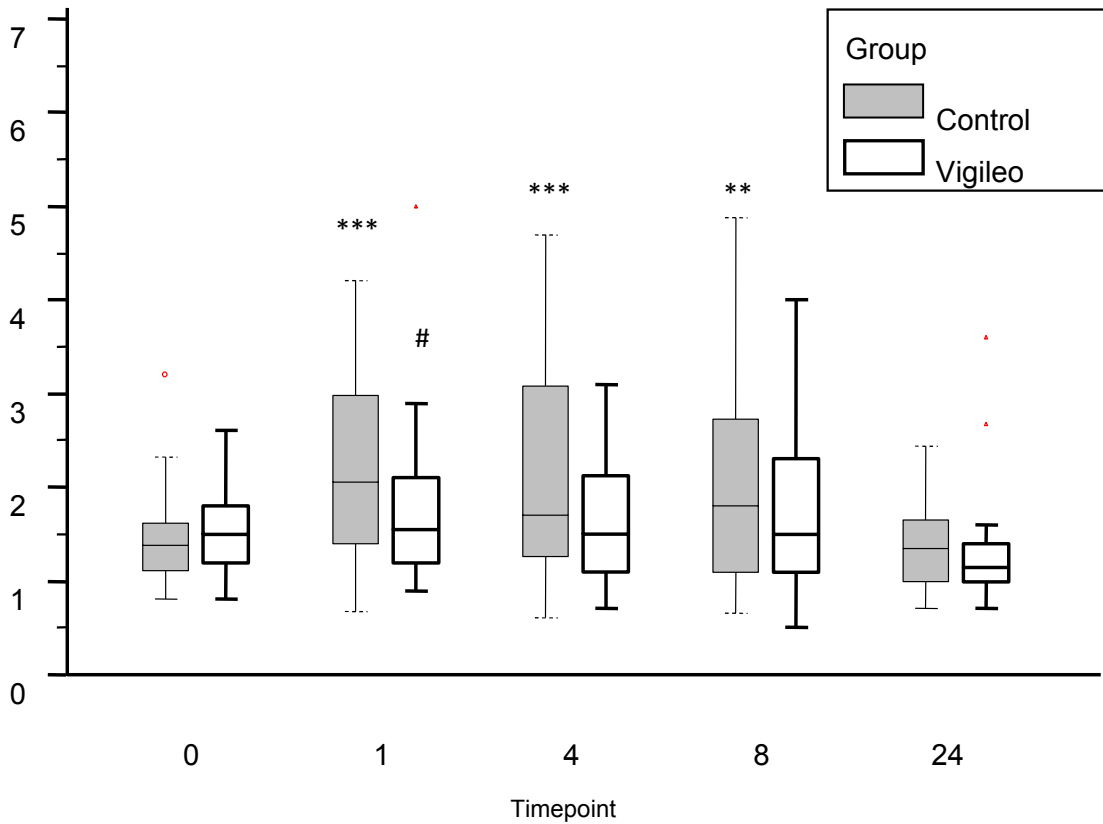

Supplement: MOESM3 [file 9732108]
